# Supplementary material for: Changes in Weight, Sedentary Behaviour and Physical Activity during the School Year and Summer Vacation
Source: MDPI journal article supplement (doi:10.3390/ijerph15050915), 2018-05-04
Supplement: s1 [file s1]

Table S1 Eating habits and frequency of air conditioner use for participants

|                                                     | Baseline |    | Follow-up |    |
|-----------------------------------------------------|----------|----|-----------|----|
|                                                     | n        | %  | n         | %  |
| Having a snack during daytime                       | 205      | 98 |           |    |
| 1. almost every day                                 | 116      | 56 |           |    |
| 2. 4-5 days/week                                    | 40       | 19 |           |    |
| 3. 2-3 days/week                                    | 35       | 17 |           |    |
| 4. eating seldom                                    | 14       | 7  |           |    |
| Having a snack at night                             | 205      | 98 |           |    |
| 1. almost every day                                 | 14       | 7  |           |    |
| 2. 4-5 days/week                                    | 11       | 5  |           |    |
| 3. 2-3 days/week                                    | 23       | 11 |           |    |
| 4. eating seldom                                    | 157      | 75 |           |    |
| Having a snack at daytime during television viewing | 206      | 99 |           |    |
| 1. normally                                         | 48       | 23 |           |    |
| 2. sometimes                                        | 44       | 21 |           |    |
| 3. rarely                                           | 60       | 29 |           |    |
| 4. never                                            | 54       | 26 |           |    |
| Having a breakfast during television viewing        | 206      | 99 |           |    |
| 1. normally                                         | 96       | 46 |           |    |
| 2. sometimes                                        | 22       | 11 |           |    |
| 3. rarely                                           | 30       | 14 |           |    |
| 4. never                                            | 58       | 28 |           |    |
| Having a dinner during television viewing           | 206      | 99 |           |    |
| 1. normally                                         | 85       | 41 |           |    |
| 2. sometimes                                        | 36       | 17 |           |    |
| 3. rarely                                           | 34       | 16 |           |    |
| 4. never                                            | 51       | 24 |           |    |
| Volume of having juice                              |          |    | 204       | 98 |
| 1. more than 4 cups of juice/day                    |          |    | 4         | 2  |
| 2. 2-3 cups of juice/day                            |          |    | 49        | 23 |
| 3. a cup of juice/day                               |          |    | 61        | 29 |
| 4. less than a cup of juice/day                     |          |    | 90        | 43 |
| Frequency of air conditioner use                    |          |    | 205       | 98 |
| 1. normally                                         |          |    | 15        | 7  |
| 2. sometimes                                        |          |    | 82        | 39 |
| 3. rarely                                           |          |    | 64        | 31 |
| 4. never                                            |          |    | 44        | 21 |
